# Supplementary material for: BRCA Reversion Mutations in Circulating Tumor DNA Predict Primary and Acquired Resistance to the PARP Inhibitor Rucaparib in High-Grade Ovarian Carcinoma
Source: Oxford University Press journal article supplement (doi:10.1158/2159-8290.cd-18-0715), 2018-11-13
Supplement: 21598290cd180715-sup-204196_2_supp_5134829_phh8nz.pdf [file 21598290cd180715-sup-204196_2_supp_5134829_phh8nz.pdf]

**Supplementary Table S2.** Association between baseline characteristics and presence of *BRCA* reversion mutations in pretreatment circulating cell-free DNA (cfDNA)

|                                                          | Patients with <i>BRCA</i> reversion mutations detected in pretreatment cfDNA ( <i>n</i> = 8) | Patients without <i>BRCA</i> reversion mutations detected in pretreatment cfDNA ( <i>n</i> = 89) | Fisher's exact <i>P</i> value |
|----------------------------------------------------------|----------------------------------------------------------------------------------------------|--------------------------------------------------------------------------------------------------|-------------------------------|
| Histological classification, <i>n</i> (%)                |                                                                                              |                                                                                                  |                               |
| Serous                                                   | 7 (87.5)                                                                                     | 86 (96.6)                                                                                        | 0.2953                        |
| Endometrioid                                             | 1 (12.5)                                                                                     | 1 (1.1)                                                                                          |                               |
| Mixed                                                    | 0 (0)                                                                                        | 2 (2.2)                                                                                          |                               |
| <i>BRCA</i> mutation type, <i>n</i> (%)                  |                                                                                              |                                                                                                  |                               |
| Germline                                                 | 5 (62.5)                                                                                     | 62 (69.7)                                                                                        | 0.6996                        |
| Somatic                                                  | 3 (37.5)                                                                                     | 27 (30.3)                                                                                        |                               |
| <i>BRCA</i> gene with deleterious mutation, <i>n</i> (%) |                                                                                              |                                                                                                  |                               |
| <i>BRCA1</i>                                             | 4 (50.0)                                                                                     | 56 (62.9)                                                                                        | 0.4757                        |
| <i>BRCA2</i>                                             | 4 (50.0)                                                                                     | 33 (37.1)                                                                                        |                               |
| Number of prior chemotherapy regimens, <i>n</i> (%)      |                                                                                              |                                                                                                  |                               |
| 1                                                        | 0 (0)                                                                                        | 8 (9.0)                                                                                          | 0.3915                        |
| 2                                                        | 0 (0)                                                                                        | 10 (11.2)                                                                                        |                               |
| 3                                                        | 3 (37.5)                                                                                     | 44 (49.4)                                                                                        |                               |
| 4                                                        | 5 (62.5)                                                                                     | 27 (30.3)                                                                                        |                               |
| Platinum response to last therapy, <i>n</i> (%)          |                                                                                              |                                                                                                  |                               |
| Sensitive                                                | 1 (12.5)                                                                                     | 47 (52.8)                                                                                        | 0.0488                        |
| Resistant                                                | 5 (62.5)                                                                                     | 33 (37.1)                                                                                        |                               |
| Refractory                                               | 2 (25.0)                                                                                     | 9 (10.1)                                                                                         |                               |
